# Supplementary material
Source: publisher site journal article supplement (https://www.dovepress.com/article/290805)
Supplement: Supplementary file 1 [file get_supplementary_file.php]

**Supplementary Material**

**Section 1**. Reference list of respiratory-related medications

| Long-acting beta agonist inhaler (LABA) | 2136139, 2136147, 2211742, 2214261, 2230898, 2231129, 2237224, 2237225, 2376938, 2407868 |
| --- | --- |
| Inhaled corticosteroid and Long-acting beta agonist inhaler (ICS+LABA) | 2240835, 2240836, 2240837, 2245126, 2245127, 2245385, 2245386, 2248218, 2361744, 2361752, 2361760, 2408872, 2444186 |
| Long-acting muscarinic agent inhaler (LAMA) | 2246793, 2394936, 2409720, 2418282, 2423596 |
| Inhaled corticosteroid (ICS) | 374407, 828521, 828548, 851752, 851760, 852074, 872334, 893633, 897353, 1949993, 1950002, 1978918, 1978926, 2079976, 2174731, 2174758, 2174766, 2174774, 2213583, 2213591, 2213605, 2213613, 2213710, 2213729, 2215039, 2215047, 2215055, 2216531, 2229099, 2237244, 2237245, 2237246, 2237247, 2242029, 2242030, 2243595, 2243596, 2244291, 2244292, 2244293, 2285606, 2285614, 2303671, 2438690, 2446561, 2446588, 2467895, 2467909, 2467917 |
| Oral corticosteroid | 15016, 15024, 16438, 16446, 16462, 21695, 28185, 30910, 30929, 30988, 36129, 36366, 156876, 176834, 210188, 232378, 252417, 271373, 271381, 280437, 285471, 295094, 312770, 354309, 489158, 508586, 550957, 598194, 607517, 610623, 868426, 868434, 868442, 1946897, 1964070, 1964968, 1964976, 2063190, 2194082, 2194090, 2237044, 2237045, 2237046, 2239534, 2240684, 2240685, 2240687, 2250055, 2260298, 2260301, 2261081, 2279363, 2311267 |
| Antibiotic | 299, 302, 434, 604, 2003, 2011, 2046, 2054, 2410, 2429, 2445, 4251, 4278, 9938, 13412, 13420, 14591, 14605, 14982, 15202, 15474, 15547, 15563, 15849, 18635, 18740, 18783, 20877, 20885, 20907, 20966, 21059, 21121, 21148, 21172, 21202, 21792, 21806, 22748, 24368, 24422, 30570, 30589, 30805, 30899, 30996, 33723, 34045, 34169, 35645, 47503, 47511, 107441, 107484, 127744, 127760, 134406, 151416, 151432, 156744, 163929, 178861, 210463, 210471, 210641, 210714, 210730, 210765, 210773, 225851, 231207, 244392, 244635, 247359, 248827, 248835, 248843, 251631, 251690, 253146, 253154, 262447, 262595, 265047, 266515, 270636, 270644, 271365, 272469, 272477, 272485, 273023, 274429, 281565, 281573, 282308, 283185, 288497, 288500, 288519, 318833, 321435, 321443, 328308, 328316, 330531, 331945, 337757, 337765, 337773, 342084, 342092, 342106, 342114, 343617, 348848, 363774, 366447, 368040, 370495, 371823, 381713, 391581, 391603, 393444, 403628, 406716, 406724, 411256, 421480, 440566, 440574, 444650, 445266, 445274, 445282, 448729, 452130, 452149, 453617, 465186, 465194, 465208, 465216, 468029, 478717, 486795, 486809, 486817, 506028, 506036, 507245, 510637, 510645, 512516, 512524, 516759, 516767, 525561, 529141, 529168, 545678, 545937, 563854, 568422, 568430, 578452, 580376, 580384, 580929, 582239, 582247, 583405, 583413, 583421, 583782, 603252, 603260, 603279, 603287, 603295, 605859, 605867, 607142, 617490, 617504, 617512, 617520, 618284, 618292, 627127, 627135, 628115, 628123, 628131, 628158, 628360, 632112, 632120, 637416, 640263, 642215, 642223, 642231, 643025, 644307, 644315, 644323, 644331, 644633, 652318, 656933, 657212, 682020, 688568, 704377, 704385, 704393, 704407, 704415, 714887, 714895, 717495, 717568, 717584, 717592, 717606, 717630, 717649, 717657, 717673, 725250, 726540, 726672, 740713, 742562, 745618, 768715, 768723, 769991, 785873, 817120, 817163, 817171, 817198, 828858, 828866, 832804, 846333, 846465, 851728, 860751, 865540, 865559, 865567, 865575, 865710, 865729, 865753, 865877, 865885, 868965, 868973, 868981, 873454, 874256, 878669, 885886, 885894, 885908, 885916, 885924, 885932, 885940, 886890, 886904, 887064, 889202, 889210, 889393, 893862, 1902636, 1905120, 1905139, 1905147, 1912216, 1914138, 1914146, 1916858, 1916866, 1916874, 1916882, 1925938, 1927345, 1927817, 1927825, 1934163, 1934171, 1934252, 1943049, 1944827, 1968408, 1968416, 1968424, 1984853, 2017687, 2024853, 2024861, 2028476, 2028484, 2030500, 2030519, 2030527, 2030535, 2032414, 2036347, 2036355, 2041286, 2041294, 2041308, 2041316, 2041685, 2042118, 2042126, 2042134, 2042142, 2042592, 2042924, 2042932, 2042975, 2043122, 2043130, 2043203, 2043289, 2043297, 2043300, 2044668, 2044676, 2051850, 2069660, 2069679, 2084090, 2084104, 2091208, 2091232, 2091291, 2091887, 2092808, 2093103, 2099659, 2099667, 2099713, 2099721, 2100533, 2108143, 2108151, 2126710, 2130025, 2130033, 2140039, 2142058, 2144190, 2144204, 2146908, 2153394, 2154366, 2155753, 2155761, 2155788, 2155796, 2155818, 2155931, 2155958, 2155966, 2155974, 2157152, 2157160, 2157179, 2157187, 2158574, 2161737, 2161745, 2161753, 2163659, 2163667, 2163675, 2163683, 2169924, 2169932, 2169975, 2169983, 2170760, 2170779, 2170787, 2173506, 2173514, 2177633, 2177641, 2177668, 2177676, 2177684, 2177781, 2177803, 2177811, 2177838, 2177846, 2177854, 2177862, 2177870, 2180758, 2180766, 2180774, 2180782, 2181487, 2181495, 2181509, 2181517, 2182866, 2185830, 2185849, 2185857, 2185865, 2185873, 2188740, 2188759, 2188767, 2188775, 2188791, 2188805, 2188813, 2188821, 2192659, 2195976, 2195984, 2195992, 2199181, 2199203, 2204347, 2204355, 2204371, 2204636, 2212021, 2212277, 2212285, 2212307, 2218399, 2223716, 2223724, 2229520, 2229521, 2229522, 2229523, 2229524, 2229582, 2229583, 2229584, 2229587, 2229588, 2229617, 2229618, 2229619, 2230126, 2230127, 2230243, 2230244, 2230245, 2230246, 2230263, 2230264, 2230615, 2230616, 2230617, 2230618, 2230735, 2230736, 2230879, 2230880, 2230944, 2230945, 2231143, 2231432, 2231433, 2231529, 2231531, 2231532, 2231691, 2231693, 2231771, 2232391, 2233017, 2235134, 2236841, 2236842, 2237154, 2237313, 2237314, 2237380, 2237381, 2237382, 2237383, 2237384, 2237500, 2237501, 2237502, 2237514, 2237682, 2237729, 2237730, 2237735, 2237875, 2237876, 2238049, 2238050, 2238051, 2238171, 2238172, 2238173, 2238174, 2238200, 2238201, 2238202, 2238203, 2238204, 2238205, 2238206, 2238207, 2238607, 2238790, 2238792, 2238793, 2238829, 2238830, 2238831, 2239098, 2239191, 2239192, 2239238, 2239239, 2239667, 2239668, 2239670, 2239761, 2239762, 2239763, 2239764, 2239982, 2240600, 2240774, 2240829, 2240830, 2240999, 2241000, 2241001, 2241195, 2241196, 2241483, 2241527, 2241637, 2241641, 2241642, 2241709, 2241710, 2241826, 2241827, 2241988, 2241989, 2241990, 2241991, 2242080, 2242081, 2242409, 2242410, 2242656, 2242657, 2242965, 2243181, 2243182, 2243224, 2243225, 2243350, 2243351, 2243474, 2243475, 2243476, 2243684, 2243686, 2243770, 2243771, 2243986, 2243987, 2244393, 2244394, 2244641, 2244646, 2244647, 2244756, 2245063, 2245064, 2245065, 2245066, 2245206, 2245207, 2245232, 2245233, 2245623, 2245646, 2245647, 2245648, 2245649, 2246596, 2246804, 2246824, 2246825, 2246826, 2246827, 2246937, 2247021, 2247200, 2247201, 2247202, 2247203, 2247339, 2247340, 2247341, 2247423, 2247520, 2247573, 2247574, 2247818, 2247819, 2247916, 2248138, 2248208, 2248209, 2248262, 2248263, 2248436, 2248437, 2248438, 2248439, 2248525, 2248526, 2248756, 2248757, 2248758, 2248804, 2248805, 2248856, 2248857, 2248968, 2249626, 2249634, 2249642, 2249650, 2249871, 2249898, 2249960, 2249979, 2249987, 2251213, 2251221, 2251248, 2251256, 2251264, 2251272, 2251280, 2251299, 2251302, 2251310, 2251329, 2251337, 2251744, 2251752, 2251760, 2251779, 2251787, 2252961, 2252988, 2252996, 2253003, 2255340, 2256088, 2258331, 2258358, 2259389, 2259400, 2259419, 2259427, 2259435, 2259478, 2261634, 2261642, 2262851, 2262878, 2262886, 2262894, 2265826, 2266539, 2266547, 2266962, 2266970, 2266989, 2267845, 2267934, 2267942, 2267950, 2269627, 2274388, 2274396, 2274531, 2274566, 2274574, 2274744, 2274752, 2275287, 2275295, 2275309, 2275317, 2278359, 2278367, 2278499, 2278502, 2278588, 2282380, 2282410, 2284677, 2284685, 2284707, 2284715, 2285649, 2286920, 2286939, 2286947, 2286955, 2287226, 2287234, 2288559, 2289431, 2289458, 2289466, 2289539, 2289547, 2289598, 2292998, 2293005, 2293382, 2293390, 2293528, 2293536, 2293579, 2293943, 2293951, 2294133, 2294141, 2294419, 2294427, 2294826, 2294834, 2298635, 2298643, 2298651, 2301504, 2302179, 2302187, 2303426, 2303434, 2303728, 2303736, 2303744, 2305585, 2306735, 2306891, 2307200, 2307219, 2307227, 2310600, 2311062, 2311445, 2311453, 2313979, 2313987, 2315157, 2315165, 2315424, 2315432, 2315440, 2317303, 2317311, 2317389, 2317427, 2317435, 2317443, 2317796, 2317818, 2317826, 2323117, 2323125, 2324172, 2324180, 2324482, 2324490, 2325942, 2326515, 2326523, 2329204, 2330881, 2330911, 2331853, 2331861, 2331888, 2332027, 2332035, 2332043, 2332132, 2332140, 2332159, 2332388, 2332396, 2334887, 2334895, 2334909, 2334917, 2335182, 2335190, 2335352, 2335360, 2335379, 2336103, 2336111, 2336340, 2336359, 2336448, 2336456, 2336871, 2336898, 2336901, 2339137, 2339145, 2339218, 2339226, 2340917, 2340925, 2341271, 2341298, 2341301, 2341328, 2341336, 2341344, 2341700, 2341719, 2341727, 2341735, 2343347, 2343355, 2343940, 2343959, 2343967, 2344823, 2344831, 2344882, 2345099, 2345501, 2345528, 2345536, 2345544, 2345552, 2346524, 2346532, 2346923, 2346931, 2347245, 2347253, 2347261, 2347288, 2347423, 2347431, 2347458, 2347466, 2347679, 2347687, 2348012, 2348020, 2351005, 2351153, 2351161, 2351188, 2351196, 2351234, 2351242, 2352710, 2352729, 2352737, 2352745, 2352753, 2352761, 2352788, 2353318, 2353326, 2353334, 2354802, 2355469, 2355477, 2355485, 2355493, 2358654, 2358662, 2358670, 2361027, 2361035, 2361426, 2361434, 2362848, 2362856, 2362864, 2362872, 2363364, 2363372, 2363380, 2363585, 2363593, 2364298, 2364719, 2364727, 2366304, 2366371, 2366398, 2372592, 2372606, 2372614, 2372770, 2372789, 2373882, 2373890, 2375885, 2378183, 2378191, 2378205, 2378671, 2378698, 2378701, 2379627, 2379635, 2379643, 2379686, 2379694, 2379708, 2380358, 2380366, 2380374, 2380587, 2380595, 2380609, 2380846, 2380854, 2381907, 2381923, 2381931, 2385074, 2385082, 2385090, 2386100, 2386119, 2386127, 2386135, 2387107, 2387115, 2388073, 2388081, 2390116, 2390124, 2390132, 2390191, 2390442, 2390450, 2391643, 2391651, 2391856, 2391929, 2400529, 2400537, 2400766, 2400847, 2400855, 2401495, 2401509, 2401517, 2401525, 2401533, 2401541, 2401568, 2401576, 2408988, 2408996, 2415542, 2415879, 2416433, 2416476, 2416484, 2418363, 2418371, 2418452, 2418460 |

**Section 2- Sensitivity Analysis**


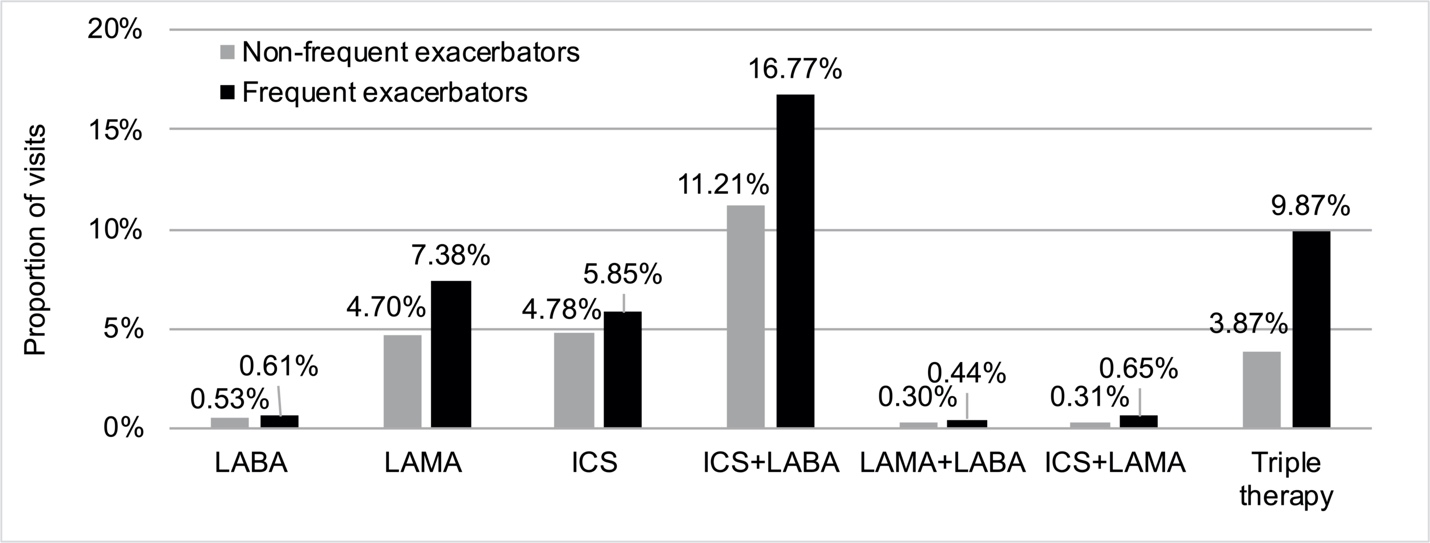


**Supplementary figure 1.** Frequency of long-acting inhaled medication prescription in frequent (dark bars) and non-frequent (light bars) exacerbators in COPD patients without asthma history.

**Abbreviations**: ICS, inhaled corticosteroids; LABA, long-acting beta-2 adrenoceptor agonists; LAMA long-acting muscarinic receptor antagonists
